# Supplementary material for: Can calculated harmonic vibrational spectra rationalize the structure of TiC-based nanoparticles?
Source: Royal Society of Chemistry journal article supplement (doi:10.1039/d1cp03406e), 2021-12-07
Supplement: d1cp03406e1.pdf [file d1cp03406e1.pdf]

## Electronic Supplementary Material for:

# Can Calculated Harmonic Vibrational Spectra Rationalize the Structure of TiC-based Nanoparticles?

Juan José Piñero,<sup>1</sup> Boutheina Kerkeni<sup>2,3</sup>, Francesc Viñes,<sup>1</sup> and, Stefan T. Bromley,<sup>1,4,\*</sup>

<sup>1</sup> *Departament de Ciència de Materials i Química Física & Institut de Química Teòrica i Computacional (IQTUB), Universitat de Barcelona, c/ Martí i Franquès 1-11, 08028 Barcelona, Spain*

<sup>2</sup> *Département de Physique, Laboratoire de Physique de la Matière Condensée (LPMC) Faculté des Sciences de Tunis, Université de Tunis El Manar. Campus Universitaire 2092, Tunisia.*

<sup>3</sup> *ISAMM, Université de la Manouba, La Manouba 2010 Tunisia.*

<sup>4</sup> *Institució Catalana de Recerca i Estudis Avançats (ICREA), Passeig de Lluís Companys, 23, 08010 Barcelona (Spain)*

\* **Corresponding author:** Stefan T. Bromley ([s.bromley@ub.edu](mailto:s.bromley@ub.edu))

1. DFT-calculated IR spectra (PBE) for the  $\text{Ti}_{17}\text{C}_{18}$  NP based on a rocksalt cut  $\text{Ti}_{18}\text{C}_{18}$  NP with one corner Ti atom removed with: i) an open shell electronic structure (2 unpaired electrons), ii) a closed shell electronic structure.

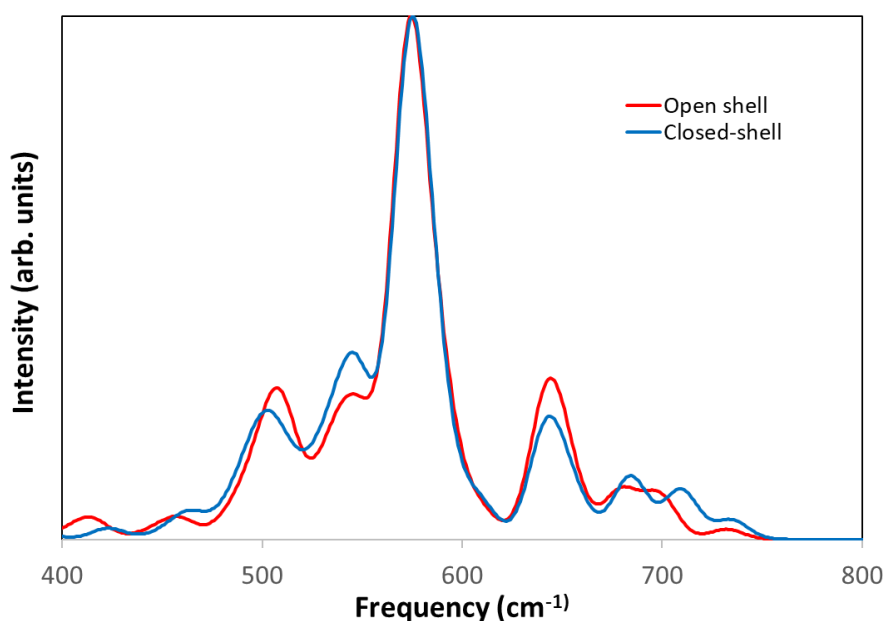

2. Tables of calculated harmonic frequencies and corresponding intensities for all reported spectra.

**Ti<sub>14</sub>C<sub>13</sub>**

| Frequency (cm <sup>-1</sup> ) | Intensity (arb. units) |
|-------------------------------|------------------------|
| 10.419                        | 3.96E-06               |
| 10.431                        | 1.45E-06               |
| 161.006                       | 3.04E-05               |
| 161.161                       | 2.48E-06               |
| 181.858                       | 1.06E-05               |
| 182.230                       | 7.60E-07               |
| 182.578                       | 4.52E-06               |
| 205.803                       | 6.89E-02               |
| 205.866                       | 6.87E-02               |
| 206.046                       | 6.83E-02               |
| 211.940                       | 1.96E-06               |
| 212.036                       | 1.07E-05               |
| 212.163                       | 2.78E-05               |
| 232.421                       | 1.47E-05               |
| 232.639                       | 4.62E-06               |
| 232.713                       | 3.50E-05               |
| 252.221                       | 1.45E-05               |
| 252.514                       | 7.78E-06               |
| 269.089                       | 1.15E-04               |
| 291.264                       | 2.25E-04               |
| 291.346                       | 3.42E-04               |
| 291.618                       | 8.96E-05               |
| 298.214                       | 3.65E-04               |
| 298.538                       | 1.18E-04               |
| 304.534                       | 4.90E-01               |
| 304.734                       | 4.65E-01               |
| 304.790                       | 4.73E-01               |
| 310.159                       | 1.10E-04               |
| 310.329                       | 1.52E-04               |
| 310.361                       | 4.43E-04               |
| 324.293                       | 1.56E+00               |
| 324.788                       | 1.58E+00               |
| 325.010                       | 1.58E+00               |
| 338.765                       | 8.23E-04               |
| 351.778                       | 2.16E-04               |
| 351.865                       | 3.64E-05               |
| 351.974                       | 1.15E-04               |
| 370.589                       | 1.74E-04               |
| 382.733                       | 9.97E-06               |
| 407.696                       | 1.88E-04               |
| 407.866                       | 1.07E-04               |
| 408.085                       | 4.29E-05               |
| 424.427                       | 1.02E-02               |
| 424.575                       | 1.20E-02               |

|         |          |
|---------|----------|
| 424.674 | 1.07E-02 |
| 428.729 | 8.26E-05 |
| 428.780 | 1.38E-04 |
| 428.973 | 6.69E-05 |
| 444.918 | 5.98E-05 |
| 445.200 | 2.29E-05 |
| 445.688 | 5.24E-05 |
| 482.714 | 2.33E-03 |
| 482.898 | 1.29E-03 |
| 483.254 | 4.13E-04 |
| 493.256 | 3.90E+00 |
| 493.704 | 3.91E+00 |
| 494.005 | 3.90E+00 |
| 513.606 | 7.44E-04 |
| 513.648 | 8.57E-04 |
| 555.132 | 1.07E-04 |
| 555.360 | 1.20E-04 |
| 556.094 | 4.40E-05 |
| 557.387 | 5.23E-05 |
| 558.188 | 2.81E-04 |
| 588.004 | 1.45E-04 |
| 669.968 | 6.97E+00 |
| 670.067 | 6.98E+00 |
| 670.537 | 6.98E+00 |
| 698.688 | 1.33E-01 |
| 699.000 | 1.23E-01 |
| 699.341 | 1.29E-01 |
| 740.808 | 1.27E-05 |
| 740.920 | 9.04E-05 |
| 741.214 | 6.43E-05 |
| 792.713 | 7.56E-05 |

**(TiC)<sub>18</sub>**

| Frequency (cm <sup>-1</sup> ) | Intensity (arb. units) |
|-------------------------------|------------------------|
| 127.514                       | 3.47E-09               |
| 148.637                       | 9.53E-03               |
| 148.665                       | 9.55E-03               |
| 185.837                       | 3.44E-03               |
| 185.912                       | 3.46E-03               |
| 191.562                       | 6.62E-07               |
| 195.425                       | 3.59E-02               |
| 207.983                       | 4.95E-08               |
| 209.683                       | 4.53E-08               |
| 214.623                       | 6.54E-03               |
| 214.624                       | 6.54E-03               |
| 220.703                       | 2.20E-08               |
| 224.966                       | 8.96E-09               |
| 234.945                       | 3.94E-03               |

|         |          |
|---------|----------|
| 234.951 | 3.95E-03 |
| 235.418 | 1.32E-05 |
| 235.532 | 8.06E-03 |
| 239.292 | 1.00E-07 |
| 261.909 | 1.41E-08 |
| 263.397 | 3.75E-08 |
| 270.226 | 5.41E-02 |
| 271.048 | 2.36E-01 |
| 271.056 | 2.36E-01 |
| 277.794 | 1.85E-01 |
| 277.800 | 1.85E-01 |
| 282.055 | 2.83E-03 |
| 299.058 | 1.12E-02 |
| 299.061 | 1.09E-02 |
| 301.528 | 8.38E-05 |
| 301.868 | 2.56E-01 |
| 301.880 | 2.55E-01 |
| 314.144 | 3.06E-07 |
| 318.809 | 4.72E-04 |
| 322.175 | 1.18E-01 |
| 322.184 | 1.12E-01 |
| 322.197 | 9.11E-03 |
| 343.956 | 1.04E-01 |
| 347.283 | 3.79E-02 |
| 347.298 | 3.79E-02 |
| 370.513 | 3.58E-08 |
| 376.248 | 4.11E-04 |
| 376.578 | 6.25E-07 |
| 385.582 | 2.42E-05 |
| 386.623 | 8.96E-06 |
| 387.797 | 2.21E-01 |
| 387.815 | 2.21E-01 |
| 395.281 | 2.15E-03 |
| 404.574 | 7.40E-02 |
| 404.602 | 7.39E-02 |
| 416.677 | 1.44E-02 |
| 416.715 | 7.23E-03 |
| 416.721 | 6.71E-03 |
| 422.358 | 9.62E-08 |
| 439.878 | 1.95E-02 |
| 439.901 | 1.96E-02 |
| 447.417 | 2.04E-02 |
| 452.196 | 7.15E-07 |
| 468.158 | 1.88E-01 |
| 468.171 | 1.88E-01 |
| 483.064 | 2.61E-05 |
| 490.318 | 9.19E-05 |
| 491.778 | 8.06E-01 |
| 491.785 | 8.07E-01 |
| 495.524 | 1.70E+00 |

|         |          |
|---------|----------|
| 498.936 | 1.18E-05 |
| 504.016 | 3.47E-05 |
| 504.037 | 2.73E-05 |
| 512.879 | 1.17E-06 |
| 517.704 | 1.87E-01 |
| 526.667 | 3.84E+00 |
| 526.688 | 3.84E+00 |
| 538.339 | 5.43E-02 |
| 538.348 | 5.51E-02 |
| 554.705 | 1.19E-01 |
| 569.741 | 1.27E-05 |
| 577.550 | 5.55E-04 |
| 582.608 | 4.86E-05 |
| 585.696 | 5.37E+00 |
| 585.718 | 5.37E+00 |
| 592.220 | 1.93E-05 |
| 606.251 | 3.10E+00 |
| 612.418 | 7.62E+00 |
| 616.318 | 3.20E-02 |
| 616.322 | 3.19E-02 |
| 616.955 | 3.24E-06 |
| 633.061 | 3.21E-06 |
| 648.127 | 1.75E-03 |
| 648.156 | 1.76E-03 |
| 692.368 | 2.09E-04 |
| 692.410 | 2.24E-04 |
| 693.834 | 2.06E-06 |
| 695.042 | 7.53E-02 |
| 704.427 | 9.11E-01 |
| 726.725 | 4.84E+00 |
| 726.834 | 2.56E+00 |
| 726.854 | 2.56E+00 |
| 745.251 | 1.68E+00 |
| 745.286 | 1.69E+00 |
| 751.282 | 1.71E-05 |
| 773.067 | 2.40E+00 |
| 773.089 | 2.40E+00 |
| 807.759 | 3.32E-08 |

**(TiC)<sub>24</sub>**

| Frequency (cm <sup>-1</sup> ) | Intensity (arb. units) |
|-------------------------------|------------------------|
| 116.064                       | 2.32E-02               |
| 142.051                       | 3.64E-06               |
| 159.793                       | 4.53E-04               |
| 160.747                       | 2.54E-02               |
| 165.516                       | 2.76E-02               |
| 166.007                       | 2.21E-02               |
| 171.451                       | 7.00E-07               |

|         |          |
|---------|----------|
| 182.962 | 6.31E-08 |
| 183.100 | 3.75E-06 |
| 184.902 | 1.93E-06 |
| 185.816 | 6.78E-07 |
| 191.077 | 9.85E-07 |
| 194.749 | 1.84E-06 |
| 206.151 | 3.32E-06 |
| 217.208 | 2.92E-07 |
| 219.884 | 8.88E-03 |
| 230.308 | 1.92E-02 |
| 231.800 | 4.25E-06 |
| 234.218 | 3.05E-06 |
| 236.950 | 4.24E-04 |
| 237.697 | 1.09E-03 |
| 238.220 | 6.46E-02 |
| 238.568 | 4.02E-04 |
| 251.675 | 9.74E-06 |
| 251.737 | 2.36E-05 |
| 253.985 | 2.90E-02 |
| 255.492 | 1.51E-02 |
| 257.359 | 4.78E-02 |
| 259.577 | 2.26E-02 |
| 261.100 | 8.49E-06 |
| 270.871 | 1.91E-03 |
| 276.216 | 1.03E-04 |
| 278.911 | 1.58E-03 |
| 279.415 | 9.23E-02 |
| 281.074 | 4.73E-07 |
| 281.978 | 7.40E-06 |
| 285.199 | 6.49E-06 |
| 296.256 | 2.47E-05 |
| 299.890 | 5.19E-05 |
| 300.836 | 5.01E-01 |
| 302.623 | 2.24E-04 |
| 304.126 | 1.02E-02 |
| 305.163 | 3.69E-04 |
| 307.059 | 1.60E-01 |
| 308.516 | 6.60E-05 |
| 313.184 | 9.37E-06 |
| 331.664 | 4.54E-01 |
| 331.976 | 8.85E-02 |
| 334.756 | 2.55E-04 |
| 335.133 | 2.17E-03 |
| 341.898 | 3.42E-05 |
| 346.175 | 7.71E-05 |
| 352.999 | 4.98E-05 |
| 356.484 | 9.22E-03 |
| 360.809 | 3.33E-01 |
| 366.384 | 1.76E-01 |
| 377.981 | 4.73E-05 |

|         |          |
|---------|----------|
| 382.664 | 6.00E-02 |
| 383.800 | 7.63E-02 |
| 384.015 | 5.27E-04 |
| 385.883 | 7.88E-05 |
| 388.146 | 3.56E-03 |
| 391.636 | 6.30E-06 |
| 395.278 | 1.55E-04 |
| 395.507 | 1.51E-05 |
| 397.278 | 8.38E-06 |
| 406.263 | 5.19E-05 |
| 409.717 | 4.62E-02 |
| 420.795 | 6.72E-06 |
| 427.580 | 1.53E-02 |
| 427.789 | 2.02E-02 |
| 432.993 | 1.16E-05 |
| 434.992 | 1.41E-02 |
| 436.321 | 4.84E-02 |
| 438.817 | 3.54E-01 |
| 442.114 | 2.71E-05 |
| 445.853 | 7.78E-02 |
| 447.057 | 6.62E-06 |
| 448.435 | 1.60E-05 |
| 471.584 | 3.03E-05 |
| 474.309 | 1.83E-05 |
| 476.924 | 4.86E-06 |
| 479.288 | 6.49E-01 |
| 480.517 | 6.15E-05 |
| 484.650 | 3.21E-03 |
| 485.417 | 6.27E-05 |
| 489.153 | 2.43E-04 |
| 493.005 | 2.53E-04 |
| 496.887 | 8.24E-01 |
| 498.554 | 9.98E-01 |
| 504.134 | 7.72E-01 |
| 507.204 | 7.24E-05 |
| 507.768 | 6.52E-05 |
| 518.698 | 7.97E+00 |
| 523.535 | 2.32E-04 |
| 530.256 | 3.74E-01 |
| 546.119 | 1.33E-04 |
| 553.311 | 8.11E-05 |
| 556.575 | 2.85E+00 |
| 562.763 | 3.49E-01 |
| 574.254 | 2.20E-04 |
| 578.371 | 2.63E-04 |
| 583.935 | 1.33E+01 |
| 584.664 | 4.52E+00 |
| 584.994 | 2.31E-01 |
| 590.101 | 3.10E-03 |
| 590.332 | 7.48E+00 |

|         |          |
|---------|----------|
| 591.468 | 7.59E-02 |
| 602.218 | 4.02E-04 |
| 608.096 | 4.63E-04 |
| 610.646 | 2.76E+00 |
| 612.589 | 8.17E-04 |
| 612.784 | 2.51E-01 |
| 618.633 | 1.33E-04 |
| 624.599 | 2.80E-04 |
| 634.230 | 7.13E-04 |
| 640.858 | 3.03E-05 |
| 647.212 | 1.78E-04 |
| 671.589 | 2.98E+00 |
| 671.618 | 4.03E-01 |
| 675.304 | 5.34E-05 |
| 680.199 | 5.53E-02 |
| 694.368 | 3.00E-05 |
| 701.923 | 4.67E-05 |
| 704.423 | 1.70E-03 |
| 706.433 | 4.10E+00 |
| 709.321 | 9.28E-01 |
| 710.138 | 5.67E+00 |
| 719.757 | 9.63E-01 |
| 721.336 | 3.88E-04 |
| 731.879 | 9.86E-04 |
| 735.325 | 5.22E+00 |
| 735.684 | 4.23E+00 |
| 738.073 | 8.38E-05 |
| 738.422 | 1.73E-03 |
| 742.800 | 1.85E-03 |
| 783.762 | 6.68E-05 |
| 785.806 | 1.17E+00 |

**(TiC)<sub>32</sub>**

| Frequency (cm <sup>-1</sup> ) | Intensity (arb. units) |
|-------------------------------|------------------------|
| 127.619                       | 2.69E-07               |
| 127.742                       | 2.13E-07               |
| 153.861                       | 2.92E-06               |
| 154.053                       | 1.45E-06               |
| 154.121                       | 1.87E-06               |
| 157.087                       | 5.74E-04               |
| 157.182                       | 5.71E-04               |
| 157.289                       | 7.52E-04               |
| 172.770                       | 7.12E-02               |
| 172.898                       | 7.15E-02               |
| 173.060                       | 7.06E-02               |
| 179.663                       | 1.62E-05               |
| 184.841                       | 1.40E-05               |
| 185.080                       | 4.15E-05               |



|         |          |
|---------|----------|
| 191.126 | 1.04E-02 |
| 191.275 | 1.07E-02 |
| 191.391 | 1.08E-02 |
| 206.590 | 1.17E-06 |
| 206.666 | 3.20E-06 |
| 206.761 | 1.61E-06 |
| 210.696 | 4.05E-06 |
| 210.744 | 4.30E-06 |
| 215.804 | 1.83E-06 |
| 230.719 | 1.20E-06 |
| 230.741 | 9.74E-07 |
| 230.776 | 2.18E-06 |
| 239.997 | 3.79E-05 |
| 240.018 | 3.10E-05 |
| 240.041 | 1.82E-05 |
| 240.645 | 7.67E-04 |
| 240.847 | 6.67E-04 |
| 240.980 | 5.01E-04 |
| 243.279 | 1.01E-04 |
| 249.486 | 1.93E-06 |
| 249.569 | 2.29E-06 |
| 249.621 | 3.17E-06 |
| 261.769 | 4.54E-05 |
| 261.794 | 4.92E-06 |
| 263.949 | 3.63E-02 |
| 264.072 | 3.60E-02 |
| 264.098 | 3.55E-02 |
| 270.586 | 5.25E-07 |
| 270.698 | 1.10E-05 |
| 270.860 | 2.10E-06 |
| 278.365 | 1.70E-03 |
| 278.400 | 1.66E-03 |
| 278.491 | 1.89E-03 |
| 286.916 | 5.41E-03 |
| 287.003 | 5.32E-03 |
| 287.065 | 5.60E-03 |
| 289.230 | 1.08E-05 |
| 289.293 | 3.99E-06 |
| 292.258 | 2.21E-06 |
| 302.907 | 5.71E-05 |
| 308.713 | 2.60E-06 |
| 308.763 | 9.74E-06 |
| 310.769 | 5.56E-06 |
| 310.822 | 3.22E-05 |
| 310.961 | 2.44E-05 |
| 315.904 | 5.08E-02 |
| 315.990 | 5.01E-02 |
| 316.060 | 4.95E-02 |
| 327.529 | 1.37E-01 |
| 327.593 | 1.39E-01 |

|         |          |
|---------|----------|
| 327.651 | 1.37E-01 |
| 334.319 | 5.30E-05 |
| 334.374 | 6.41E-05 |
| 334.436 | 4.43E-05 |
| 337.842 | 1.22E-04 |
| 344.125 | 8.92E-05 |
| 344.270 | 8.14E-05 |
| 356.957 | 9.18E-02 |
| 357.227 | 9.37E-02 |
| 357.509 | 9.32E-02 |
| 367.601 | 2.42E-02 |
| 367.715 | 2.67E-02 |
| 367.840 | 2.69E-02 |
| 381.125 | 1.07E-05 |
| 381.209 | 9.43E-06 |
| 381.292 | 7.05E-05 |
| 384.192 | 9.98E-06 |
| 385.443 | 5.35E-05 |
| 385.544 | 2.61E-05 |
| 385.654 | 1.41E-05 |
| 386.610 | 3.73E-05 |
| 386.717 | 2.61E-06 |
| 402.163 | 4.90E-05 |
| 404.525 | 1.71E-02 |
| 404.690 | 1.64E-02 |
| 404.711 | 1.66E-02 |
| 414.975 | 1.54E-01 |
| 415.103 | 1.54E-01 |
| 415.287 | 1.50E-01 |
| 424.091 | 5.35E-05 |
| 424.188 | 8.06E-06 |
| 424.214 | 4.89E-05 |
| 437.111 | 9.84E-05 |
| 437.145 | 1.45E-04 |
| 438.756 | 2.32E-02 |
| 439.078 | 1.02E-01 |
| 439.098 | 7.83E-02 |
| 439.117 | 1.01E-01 |
| 450.329 | 7.72E-05 |
| 450.488 | 2.76E-05 |
| 450.575 | 9.93E-05 |
| 458.446 | 7.80E-04 |
| 458.481 | 3.63E-04 |
| 459.747 | 5.13E-01 |
| 459.823 | 5.03E-01 |
| 459.865 | 4.96E-01 |
| 471.082 | 6.12E-02 |
| 471.121 | 6.80E-02 |
| 471.131 | 6.30E-02 |
| 474.111 | 2.54E-05 |

|         |          |
|---------|----------|
| 474.145 | 9.25E-05 |
| 474.189 | 1.43E-04 |
| 485.249 | 5.58E-05 |
| 485.303 | 5.02E-05 |
| 485.331 | 3.74E-05 |
| 494.769 | 8.53E-03 |
| 494.806 | 9.37E-04 |
| 495.754 | 1.78E+00 |
| 495.790 | 1.78E+00 |
| 495.932 | 1.76E+00 |
| 497.267 | 7.17E-03 |
| 533.805 | 7.72E-01 |
| 533.882 | 7.52E-01 |
| 533.936 | 7.51E-01 |
| 544.269 | 7.09E-04 |
| 544.370 | 4.71E-05 |
| 550.502 | 4.98E-04 |
| 566.699 | 9.31E+00 |
| 566.813 | 9.31E+00 |
| 566.900 | 9.37E+00 |
| 575.458 | 3.70E-04 |
| 575.528 | 7.28E-04 |
| 575.558 | 2.45E-04 |
| 579.832 | 1.70E-02 |
| 579.890 | 1.43E-02 |
| 581.562 | 6.10E+00 |
| 581.773 | 6.23E+00 |
| 581.838 | 6.21E+00 |
| 598.896 | 1.47E-03 |
| 599.381 | 7.14E-04 |
| 608.023 | 4.69E-04 |
| 608.030 | 6.48E-05 |
| 608.157 | 4.85E-05 |
| 609.457 | 9.13E-01 |
| 609.491 | 9.24E-01 |
| 609.500 | 9.28E-01 |
| 615.785 | 8.03E-05 |
| 615.826 | 4.03E-05 |
| 615.853 | 9.13E-05 |
| 628.600 | 3.19E-04 |
| 628.630 | 4.48E-04 |
| 628.659 | 2.87E-04 |
| 628.767 | 4.59E-04 |
| 628.900 | 8.90E-04 |
| 652.882 | 3.78E-05 |
| 652.912 | 2.67E-06 |
| 652.964 | 3.03E-05 |
| 679.270 | 8.01E-01 |
| 679.328 | 8.02E-01 |
| 679.401 | 7.74E-01 |

|         |          |
|---------|----------|
| 694.266 | 7.02E-03 |
| 694.294 | 3.47E-03 |
| 699.135 | 6.87E+00 |
| 699.358 | 6.78E+00 |
| 699.458 | 6.82E+00 |
| 703.627 | 9.35E-03 |
| 709.308 | 6.41E-04 |
| 709.329 | 1.61E-03 |
| 711.315 | 1.17E-01 |
| 711.353 | 2.38E-01 |
| 711.378 | 3.34E-01 |
| 711.415 | 6.79E-01 |
| 711.518 | 1.32E+00 |
| 711.612 | 1.29E+00 |
| 714.111 | 3.47E-04 |
| 721.906 | 4.70E-04 |
| 721.919 | 5.92E-04 |
| 721.966 | 1.51E-03 |
| 751.836 | 6.06E-01 |
| 752.024 | 6.42E-01 |
| 752.128 | 6.29E-01 |
| 760.037 | 1.29E-04 |

**(TiC)<sub>40</sub>**

| Frequency (cm <sup>-1</sup> ) | Intensity (arb. units) |
|-------------------------------|------------------------|
| 101.732                       | 2.24E-06               |
| 122.880                       | 2.58E-03               |
| 126.001                       | 3.92E-03               |
| 133.221                       | 2.44E-02               |
| 138.274                       | 5.22E-05               |
| 140.614                       | 4.73E-06               |
| 156.749                       | 2.11E-05               |
| 159.165                       | 1.42E-04               |
| 162.447                       | 1.03E-04               |
| 165.138                       | 3.83E-02               |
| 166.984                       | 5.21E-02               |
| 168.602                       | 3.93E-05               |
| 169.378                       | 1.99E-04               |
| 180.286                       | 2.02E-05               |
| 181.159                       | 1.05E-01               |
| 183.350                       | 2.01E-04               |
| 183.742                       | 4.07E-06               |
| 187.104                       | 8.52E-06               |
| 197.091                       | 1.85E-05               |
| 198.512                       | 7.60E-03               |
| 199.853                       | 6.62E-05               |
| 204.524                       | 2.14E-06               |
| 206.520                       | 2.78E-03               |

|         |          |
|---------|----------|
| 207.032 | 1.21E-02 |
| 208.793 | 1.98E-06 |
| 210.503 | 2.19E-06 |
| 214.535 | 1.19E-04 |
| 217.071 | 9.16E-03 |
| 218.199 | 3.41E-05 |
| 219.584 | 2.64E-03 |
| 226.434 | 6.63E-06 |
| 229.576 | 2.28E-04 |
| 232.706 | 1.11E-02 |
| 235.409 | 3.28E-05 |
| 237.373 | 2.55E-03 |
| 237.904 | 1.57E-03 |
| 238.751 | 1.70E-05 |
| 244.383 | 8.95E-07 |
| 248.153 | 9.74E-07 |
| 248.233 | 3.16E-06 |
| 248.993 | 7.41E-04 |
| 252.269 | 7.14E-07 |
| 257.004 | 4.75E-06 |
| 258.729 | 5.11E-05 |
| 259.039 | 3.78E-04 |
| 260.627 | 8.10E-06 |
| 260.837 | 2.48E-05 |
| 262.709 | 2.48E-04 |
| 265.833 | 2.64E-06 |
| 266.388 | 1.79E-01 |
| 268.560 | 4.69E-06 |
| 270.061 | 2.21E-05 |
| 271.938 | 5.90E-02 |
| 273.277 | 2.15E-03 |
| 273.825 | 5.12E-05 |
| 274.439 | 1.85E-05 |
| 276.355 | 1.07E-05 |
| 277.980 | 6.15E-07 |
| 281.413 | 5.34E-05 |
| 281.670 | 7.89E-04 |
| 282.247 | 1.37E-06 |
| 287.788 | 8.31E-07 |
| 288.458 | 4.53E-05 |
| 291.576 | 1.51E-05 |
| 291.756 | 3.54E-03 |
| 296.313 | 2.17E-02 |
| 297.935 | 2.47E-05 |
| 299.139 | 4.25E-03 |
| 299.667 | 4.05E-05 |
| 300.833 | 5.19E-03 |
| 305.049 | 8.34E-05 |
| 305.680 | 1.40E-01 |
| 306.590 | 2.09E-03 |

|         |          |
|---------|----------|
| 308.504 | 4.03E-01 |
| 313.885 | 3.82E-02 |
| 314.350 | 5.07E-05 |
| 314.734 | 4.34E-05 |
| 319.457 | 1.47E-03 |
| 320.504 | 1.51E-04 |
| 323.329 | 1.21E-01 |
| 326.934 | 8.76E-05 |
| 331.149 | 7.30E-05 |
| 334.465 | 2.30E-01 |
| 336.443 | 4.45E-01 |
| 337.373 | 1.14E-02 |
| 338.874 | 1.06E-04 |
| 339.926 | 2.72E-04 |
| 340.924 | 5.14E-05 |
| 345.496 | 4.40E-04 |
| 349.010 | 3.06E-04 |
| 350.350 | 1.36E-01 |
| 350.913 | 5.60E-02 |
| 352.686 | 7.29E-02 |
| 362.476 | 5.66E-05 |
| 366.341 | 2.85E-06 |
| 368.907 | 2.81E-05 |
| 370.775 | 3.45E-05 |
| 371.610 | 1.52E-03 |
| 376.617 | 4.25E-02 |
| 377.286 | 1.48E-04 |
| 381.122 | 5.48E-05 |
| 381.666 | 6.41E-05 |
| 382.645 | 5.35E-03 |
| 387.325 | 1.34E-05 |
| 387.639 | 2.36E-06 |
| 389.939 | 3.25E-05 |
| 391.406 | 6.38E-03 |
| 391.919 | 5.39E-05 |
| 394.842 | 9.69E-06 |
| 395.731 | 9.31E-04 |
| 396.340 | 1.90E-01 |
| 401.458 | 9.36E-02 |
| 402.416 | 9.63E-04 |
| 406.949 | 7.34E-02 |
| 413.326 | 6.74E-05 |
| 414.913 | 1.68E-01 |
| 421.309 | 2.69E-01 |
| 422.371 | 1.99E-04 |
| 423.809 | 6.39E-03 |
| 424.980 | 3.04E-05 |
| 427.079 | 3.63E-05 |
| 427.288 | 1.10E-05 |
| 429.686 | 6.36E-05 |

|         |          |
|---------|----------|
| 432.338 | 2.83E-02 |
| 433.446 | 2.99E-04 |
| 437.009 | 3.45E-03 |
| 437.406 | 1.20E-04 |
| 438.327 | 5.91E-02 |
| 443.904 | 1.78E-05 |
| 448.151 | 7.20E-02 |
| 449.853 | 1.17E-03 |
| 450.346 | 4.17E-05 |
| 450.977 | 1.55E-04 |
| 453.379 | 3.51E-04 |
| 453.979 | 1.97E-02 |
| 454.509 | 5.40E-05 |
| 455.733 | 5.81E-01 |
| 459.234 | 2.77E-01 |
| 465.826 | 4.14E-01 |
| 468.238 | 5.52E-05 |
| 470.528 | 8.62E-05 |
| 473.653 | 4.89E-03 |
| 474.000 | 2.50E-01 |
| 474.927 | 1.10E-02 |
| 478.504 | 1.97E-04 |
| 482.339 | 3.69E-04 |
| 485.416 | 2.07E-04 |
| 487.945 | 1.05E+00 |
| 488.528 | 1.40E+00 |
| 488.634 | 9.21E-03 |
| 488.876 | 3.71E-02 |
| 491.534 | 6.64E-05 |
| 492.842 | 1.62E+00 |
| 492.983 | 1.12E-02 |
| 496.561 | 9.98E-05 |
| 522.069 | 1.81E+00 |
| 522.507 | 1.36E+00 |
| 529.248 | 2.03E-03 |
| 534.611 | 3.85E+00 |
| 534.845 | 3.10E+00 |
| 535.377 | 2.71E-02 |
| 539.659 | 8.19E-04 |
| 543.814 | 1.34E-03 |
| 545.190 | 5.88E-04 |
| 552.251 | 8.84E+00 |
| 558.410 | 1.09E+00 |
| 564.871 | 1.03E+01 |
| 564.957 | 1.11E-01 |
| 566.657 | 1.33E+01 |
| 567.823 | 3.03E-04 |
| 569.993 | 2.50E-03 |
| 573.976 | 1.20E-03 |
| 575.740 | 2.15E-01 |

|         |          |
|---------|----------|
| 576.081 | 1.90E-02 |
| 579.029 | 9.18E+00 |
| 583.926 | 7.25E-04 |
| 591.881 | 2.59E-04 |
| 593.047 | 1.13E-03 |
| 593.308 | 2.68E-04 |
| 595.101 | 2.70E-01 |
| 595.526 | 1.50E-02 |
| 596.156 | 2.42E+00 |
| 601.953 | 2.38E-04 |
| 604.355 | 3.82E-04 |
| 605.214 | 4.72E-05 |
| 607.250 | 1.25E+00 |
| 608.284 | 5.50E-03 |
| 608.416 | 4.66E-03 |
| 612.553 | 1.22E-04 |
| 615.208 | 1.02E-01 |
| 621.340 | 9.86E-03 |
| 624.549 | 5.92E-02 |
| 624.674 | 4.47E-01 |
| 625.277 | 4.61E-04 |
| 625.549 | 4.68E-03 |
| 627.295 | 5.02E-05 |
| 628.541 | 3.09E-02 |
| 632.006 | 1.69E-05 |
| 643.214 | 5.37E-05 |
| 646.250 | 1.28E-05 |
| 649.636 | 7.44E-05 |
| 655.622 | 1.17E+00 |
| 667.698 | 6.55E-03 |
| 668.931 | 6.77E-01 |
| 676.105 | 3.87E-05 |
| 679.747 | 1.05E+01 |
| 686.447 | 6.52E-01 |
| 686.482 | 2.15E+00 |
| 688.195 | 5.04E+00 |
| 690.694 | 1.02E-03 |
| 691.991 | 1.04E-02 |
| 693.743 | 5.01E+00 |
| 694.848 | 8.38E-05 |
| 695.914 | 3.60E-04 |
| 700.473 | 1.80E+00 |
| 703.090 | 2.65E-01 |
| 703.972 | 2.98E-03 |
| 704.599 | 1.79E-04 |
| 706.647 | 4.20E-04 |
| 707.217 | 1.33E-03 |
| 708.348 | 3.15E-01 |
| 708.627 | 2.13E+00 |
| 709.029 | 3.31E-03 |



|         |          |
|---------|----------|
| 713.246 | 1.07E-03 |
| 717.094 | 8.79E-05 |
| 718.591 | 2.74E-05 |
| 718.757 | 5.91E-04 |
| 721.249 | 6.18E-01 |
| 721.381 | 1.70E-01 |
| 722.817 | 3.21E-01 |
| 745.639 | 2.72E-04 |
| 748.859 | 1.26E+00 |
| 758.348 | 1.29E+00 |
| 762.104 | 8.47E-05 |

(TiC)<sub>50</sub>

| Frequency (cm <sup>-1</sup> ) | Intensity (arb. units) |
|-------------------------------|------------------------|
| 93.018                        | 1.10E-06               |
| 119.502                       | 7.22E-06               |
| 121.455                       | 1.47E-05               |
| 124.209                       | 1.75E-05               |
| 131.442                       | 3.46E-03               |
| 131.853                       | 3.17E-03               |
| 133.536                       | 8.34E-03               |
| 138.769                       | 2.58E-03               |
| 139.697                       | 2.97E-03               |
| 151.851                       | 4.33E-05               |
| 154.980                       | 3.01E-04               |
| 155.490                       | 2.38E-04               |
| 156.969                       | 1.81E-04               |
| 164.083                       | 1.19E-02               |
| 171.443                       | 4.29E-02               |
| 171.904                       | 4.31E-02               |
| 181.168                       | 2.63E-05               |
| 184.969                       | 2.43E-05               |
| 186.353                       | 9.98E-04               |
| 187.574                       | 3.16E-02               |
| 187.872                       | 3.10E-02               |
| 190.781                       | 2.17E-04               |
| 191.448                       | 2.07E-03               |
| 191.704                       | 2.28E-03               |
| 196.347                       | 6.24E-06               |
| 198.546                       | 1.55E-05               |
| 200.957                       | 1.56E-05               |
| 202.891                       | 5.12E-05               |
| 203.135                       | 7.11E-06               |
| 210.552                       | 5.57E-06               |
| 213.612                       | 3.42E-03               |
| 214.136                       | 9.60E-03               |
| 214.391                       | 5.84E-03               |
| 216.561                       | 6.53E-03               |

|         |          |
|---------|----------|
| 216.703 | 7.24E-03 |
| 216.915 | 2.84E-03 |
| 222.760 | 6.91E-03 |
| 229.920 | 1.79E-05 |
| 230.230 | 2.12E-06 |
| 231.476 | 3.04E-05 |
| 231.785 | 7.88E-05 |
| 234.562 | 1.73E-05 |
| 237.670 | 3.95E-05 |
| 242.049 | 1.62E-03 |
| 242.174 | 1.53E-03 |
| 245.974 | 1.96E-03 |
| 246.426 | 1.52E-02 |
| 246.604 | 1.68E-02 |
| 247.102 | 2.14E-04 |
| 247.380 | 2.91E-04 |
| 251.582 | 3.03E-03 |
| 255.698 | 1.32E-05 |
| 256.645 | 4.79E-04 |
| 256.717 | 5.90E-04 |
| 256.812 | 7.12E-04 |
| 260.873 | 2.96E-03 |
| 260.952 | 9.10E-03 |
| 262.318 | 1.85E-02 |
| 262.431 | 2.01E-02 |
| 263.498 | 1.25E-02 |
| 263.671 | 1.03E-02 |
| 266.546 | 3.89E-05 |
| 268.511 | 2.73E-03 |
| 268.938 | 1.35E-01 |
| 269.057 | 1.32E-01 |
| 269.570 | 1.33E-02 |
| 272.881 | 5.60E-03 |
| 272.962 | 5.59E-03 |
| 275.099 | 2.10E-05 |
| 275.526 | 3.60E-05 |
| 277.445 | 3.51E-05 |
| 277.944 | 3.65E-02 |
| 279.914 | 1.69E-02 |
| 279.975 | 1.73E-02 |
| 286.016 | 2.40E-04 |
| 287.417 | 8.13E-03 |
| 287.558 | 1.98E-02 |
| 287.954 | 6.44E-02 |
| 288.217 | 7.83E-02 |
| 288.616 | 9.11E-04 |
| 293.029 | 1.08E-03 |
| 293.536 | 9.22E-05 |
| 294.620 | 1.26E-01 |
| 294.714 | 1.29E-01 |

|         |          |
|---------|----------|
| 295.308 | 9.31E-03 |
| 295.595 | 5.64E-02 |
| 295.703 | 5.14E-02 |
| 296.004 | 9.73E-04 |
| 300.670 | 4.51E-03 |
| 303.801 | 2.49E-05 |
| 306.348 | 1.03E-02 |
| 306.714 | 1.61E-02 |
| 310.942 | 2.56E-01 |
| 311.122 | 2.17E-01 |
| 311.304 | 3.47E-02 |
| 314.209 | 1.42E-05 |
| 315.276 | 7.10E-05 |
| 315.842 | 1.11E-02 |
| 315.947 | 1.51E-02 |
| 320.863 | 1.16E-04 |
| 325.304 | 3.63E-04 |
| 325.841 | 2.22E-01 |
| 327.011 | 3.20E-01 |
| 327.202 | 3.30E-01 |
| 329.997 | 1.05E-04 |
| 333.611 | 2.91E-02 |
| 336.572 | 1.20E-01 |
| 336.892 | 1.03E-01 |
| 339.111 | 1.74E-02 |
| 339.315 | 1.71E-02 |
| 346.078 | 2.98E-02 |
| 346.261 | 5.35E-02 |
| 346.378 | 5.26E-02 |
| 349.340 | 1.36E-05 |
| 352.227 | 2.00E-04 |
| 352.518 | 2.61E-05 |
| 355.936 | 9.67E-05 |
| 359.989 | 3.79E-05 |
| 364.619 | 1.86E-02 |
| 364.699 | 1.44E-02 |
| 365.020 | 9.54E-02 |
| 368.265 | 3.42E-05 |
| 369.268 | 9.81E-04 |
| 373.870 | 2.82E-02 |
| 374.030 | 8.64E-03 |
| 374.204 | 1.69E-02 |
| 374.300 | 4.61E-02 |
| 374.794 | 1.78E-04 |
| 375.815 | 8.07E-03 |
| 380.264 | 7.60E-03 |
| 381.179 | 3.52E-02 |
| 381.472 | 3.74E-02 |
| 386.744 | 5.22E-03 |
| 387.007 | 5.58E-03 |

|         |          |
|---------|----------|
| 387.265 | 2.20E-04 |
| 395.825 | 2.28E-04 |
| 396.988 | 1.07E-05 |
| 400.633 | 1.72E-01 |
| 400.773 | 1.88E-01 |
| 401.900 | 6.28E-02 |
| 402.009 | 6.75E-02 |
| 402.617 | 2.17E-03 |
| 405.220 | 3.11E-04 |
| 405.905 | 5.26E-02 |
| 409.775 | 3.39E-02 |
| 409.935 | 1.72E-02 |
| 410.561 | 2.79E-01 |
| 413.741 | 6.44E-05 |
| 415.982 | 1.08E-03 |
| 418.419 | 1.54E-04 |
| 422.756 | 2.93E-02 |
| 422.760 | 2.82E-02 |
| 423.595 | 2.05E-04 |
| 426.388 | 2.43E-05 |
| 426.535 | 6.12E-05 |
| 426.947 | 3.42E-06 |
| 429.330 | 8.99E-05 |
| 429.762 | 4.22E-05 |
| 432.624 | 2.04E-04 |
| 432.898 | 5.59E-03 |
| 432.978 | 6.89E-03 |
| 436.242 | 4.15E-02 |
| 436.727 | 1.01E-01 |
| 436.807 | 1.01E-01 |
| 438.433 | 1.25E-04 |
| 446.246 | 3.25E-04 |
| 446.677 | 6.83E-04 |
| 449.487 | 8.19E-02 |
| 449.666 | 9.65E-02 |
| 451.443 | 2.74E-01 |
| 451.472 | 2.58E-01 |
| 455.536 | 1.62E-01 |
| 456.276 | 1.30E-04 |
| 456.602 | 1.33E-04 |
| 462.036 | 4.26E-03 |
| 462.216 | 5.90E-03 |
| 465.833 | 3.79E-02 |
| 466.037 | 3.80E-02 |
| 467.597 | 7.49E-02 |
| 470.752 | 1.58E-04 |
| 477.610 | 1.32E-02 |
| 477.652 | 1.63E-02 |
| 483.642 | 4.65E-04 |
| 484.948 | 2.71E-01 |

|         |          |
|---------|----------|
| 485.208 | 2.60E-01 |
| 486.337 | 2.40E-03 |
| 486.646 | 1.34E-04 |
| 486.853 | 1.30E-03 |
| 487.039 | 1.67E-02 |
| 489.908 | 6.79E-01 |
| 490.297 | 6.25E-01 |
| 495.476 | 1.88E+00 |
| 518.611 | 1.09E-02 |
| 520.465 | 1.12E+00 |
| 520.645 | 8.20E-01 |
| 521.221 | 5.97E-02 |
| 523.376 | 5.33E+00 |
| 523.400 | 5.44E+00 |
| 527.746 | 2.58E+00 |
| 529.043 | 2.93E-03 |
| 532.645 | 3.84E+00 |
| 532.661 | 3.98E+00 |
| 533.644 | 3.12E-01 |
| 541.564 | 3.33E-03 |
| 545.550 | 1.61E-03 |
| 547.230 | 2.19E+00 |
| 548.218 | 2.20E+00 |
| 548.529 | 2.17E+00 |
| 550.866 | 2.44E-03 |
| 554.813 | 2.91E+00 |
| 554.998 | 2.78E+00 |
| 562.250 | 2.74E+00 |
| 562.425 | 1.95E+00 |
| 562.722 | 8.97E+00 |
| 564.147 | 6.68E-03 |
| 568.101 | 2.45E-03 |
| 577.229 | 1.70E-01 |
| 577.348 | 1.40E-01 |
| 580.381 | 6.98E-04 |
| 581.424 | 1.43E+00 |
| 585.831 | 7.69E-01 |
| 585.864 | 8.42E-01 |
| 586.620 | 2.33E+00 |
| 590.562 | 8.98E-04 |
| 591.655 | 6.21E-03 |
| 592.399 | 1.69E-03 |
| 594.046 | 1.24E+00 |
| 594.051 | 1.27E+00 |
| 598.641 | 8.50E-04 |
| 601.854 | 2.85E-02 |
| 603.796 | 1.41E-01 |
| 603.862 | 1.42E-01 |
| 605.560 | 4.70E-04 |
| 608.239 | 3.96E-04 |

|         |          |
|---------|----------|
| 608.562 | 7.41E-02 |
| 608.713 | 6.85E-02 |
| 619.399 | 8.20E-02 |
| 619.654 | 7.97E-02 |
| 620.100 | 5.33E-04 |
| 620.646 | 2.16E-03 |
| 621.935 | 4.62E-02 |
| 622.040 | 5.45E-02 |
| 623.491 | 3.33E-04 |
| 624.199 | 4.08E-01 |
| 624.366 | 4.09E-01 |
| 626.220 | 2.07E-04 |
| 627.281 | 7.55E-05 |
| 630.607 | 5.51E-05 |
| 638.358 | 9.19E-01 |
| 638.419 | 8.91E-01 |
| 641.871 | 3.16E-01 |
| 641.910 | 3.08E-01 |
| 656.227 | 6.43E-04 |
| 659.777 | 3.97E-01 |
| 662.148 | 2.28E+00 |
| 662.872 | 2.16E+00 |
| 669.886 | 1.94E-04 |
| 670.473 | 6.43E-02 |
| 671.577 | 3.66E+00 |
| 671.755 | 3.96E+00 |
| 673.573 | 2.83E+00 |
| 676.706 | 4.04E-03 |
| 684.837 | 5.72E-01 |
| 684.903 | 5.79E-01 |
| 688.791 | 9.86E-01 |
| 688.809 | 9.25E-01 |
| 689.254 | 1.05E-01 |
| 689.468 | 5.33E-01 |
| 691.385 | 3.18E-02 |
| 691.549 | 1.01E-01 |
| 693.644 | 4.14E-03 |
| 693.822 | 1.07E-02 |
| 697.460 | 2.05E-03 |
| 699.087 | 1.00E+00 |
| 702.016 | 1.69E+00 |
| 702.126 | 1.51E+00 |
| 704.421 | 1.08E+00 |
| 704.583 | 1.31E+00 |
| 704.764 | 1.81E-02 |
| 709.008 | 3.65E-04 |
| 709.129 | 2.38E-04 |
| 712.835 | 5.66E-04 |
| 713.340 | 5.93E-01 |
| 713.450 | 3.30E-01 |

|         |          |
|---------|----------|
| 713.753 | 7.14E-01 |
| 716.481 | 1.47E+00 |
| 716.665 | 2.85E-02 |
| 723.665 | 3.04E-03 |
| 725.413 | 1.25E-02 |
| 725.531 | 1.19E-02 |
| 737.416 | 3.65E-04 |
| 752.311 | 1.12E+00 |
| 752.556 | 1.15E+00 |
| 764.575 | 5.72E-01 |

### Ti<sub>18</sub>C<sub>14</sub>

| Frequency (cm <sup>-1</sup> ) | Intensity (arb. units) |
|-------------------------------|------------------------|
| 132.418                       | 3.04E-06               |
| 137.663                       | 4.84E-06               |
| 147.137                       | 4.31E-03               |
| 147.672                       | 4.12E-03               |
| 163.957                       | 2.32E-05               |
| 179.697                       | 1.07E-03               |
| 182.489                       | 5.33E-04               |
| 188.870                       | 2.64E-04               |
| 191.903                       | 1.47E-02               |
| 194.008                       | 2.44E-02               |
| 205.184                       | 2.58E-04               |
| 211.495                       | 2.82E-01               |
| 212.085                       | 2.66E-01               |
| 213.990                       | 9.56E-02               |
| 222.979                       | 7.07E-02               |
| 226.581                       | 1.48E-03               |
| 228.079                       | 9.38E-03               |
| 228.435                       | 9.34E-03               |
| 230.897                       | 2.59E-05               |
| 239.497                       | 4.86E-05               |
| 243.980                       | 1.87E-03               |
| 244.334                       | 2.98E-03               |
| 247.858                       | 2.82E-05               |
| 257.874                       | 4.72E-07               |
| 263.860                       | 7.26E-06               |
| 271.193                       | 4.25E-05               |
| 271.969                       | 1.12E-05               |
| 275.020                       | 3.15E-04               |
| 275.819                       | 3.52E-04               |
| 289.220                       | 4.51E-02               |
| 300.741                       | 8.29E-05               |
| 302.628                       | 7.93E-03               |
| 302.799                       | 9.91E-03               |
| 303.445                       | 2.89E-02               |
| 303.751                       | 3.10E-02               |

|         |          |
|---------|----------|
| 314.218 | 4.35E-02 |
| 320.806 | 6.77E-02 |
| 341.853 | 7.17E-02 |
| 349.355 | 2.07E-02 |
| 349.652 | 1.90E-02 |
| 351.944 | 3.26E-05 |
| 362.423 | 1.69E-01 |
| 362.589 | 1.72E-01 |
| 374.530 | 8.12E-02 |
| 381.914 | 1.42E-02 |
| 386.063 | 9.37E-05 |
| 387.587 | 1.51E-04 |
| 399.071 | 2.38E-02 |
| 399.284 | 2.40E-02 |
| 423.167 | 7.43E-04 |
| 425.686 | 8.27E-02 |
| 425.840 | 8.44E-02 |
| 426.823 | 5.00E-01 |
| 449.707 | 4.52E-02 |
| 449.798 | 4.53E-02 |
| 451.862 | 3.35E-04 |
| 458.083 | 2.67E-04 |
| 461.644 | 2.85E-02 |
| 493.630 | 5.41E-01 |
| 493.784 | 5.51E-01 |
| 499.941 | 1.51E+00 |
| 503.905 | 2.75E-01 |
| 504.273 | 2.38E-01 |
| 508.300 | 6.82E-04 |
| 518.306 | 2.15E-03 |
| 523.449 | 3.46E+00 |
| 523.879 | 3.50E+00 |
| 542.795 | 1.15E+00 |
| 560.760 | 5.01E-05 |
| 574.219 | 1.18E+00 |
| 604.665 | 1.19E+00 |
| 605.311 | 1.22E+00 |
| 613.716 | 1.59E-02 |
| 622.750 | 5.19E-05 |
| 644.080 | 3.11E-02 |
| 645.477 | 2.88E-02 |
| 647.141 | 4.04E-03 |
| 665.569 | 2.03E+00 |
| 675.716 | 5.54E-01 |
| 676.702 | 5.77E-01 |
| 686.546 | 3.27E+00 |
| 697.553 | 2.89E-02 |
| 698.154 | 2.16E-02 |
| 707.426 | 1.37E-04 |
| 712.039 | 1.15E-01 |



|         |          |
|---------|----------|
| 712.727 | 1.16E-01 |
| 727.904 | 6.80E-01 |
| 747.909 | 2.54E+00 |
| 747.971 | 2.57E+00 |
| 790.237 | 3.66E-05 |

**Ti<sub>17</sub>C<sub>18</sub>**

| Frequency (cm <sup>-1</sup> ) | Intensity (arb. units) |
|-------------------------------|------------------------|
| 54.080                        | 3.41E-01               |
| 88.263                        | 2.47E-02               |
| 131.843                       | 3.12E-01               |
| 139.494                       | 1.48E-02               |
| 142.377                       | 4.30E-02               |
| 150.851                       | 6.29E-04               |
| 157.214                       | 3.71E-02               |
| 170.887                       | 6.55E-03               |
| 174.920                       | 6.14E-03               |
| 176.624                       | 2.85E-02               |
| 178.441                       | 4.73E-02               |
| 187.272                       | 1.78E-01               |
| 191.831                       | 6.65E-02               |
| 193.708                       | 9.21E-02               |
| 201.223                       | 2.97E-02               |
| 208.001                       | 1.19E-02               |
| 210.473                       | 7.16E-02               |
| 214.292                       | 2.99E-02               |
| 225.715                       | 1.36E-01               |
| 232.371                       | 2.83E-02               |
| 239.930                       | 4.70E-02               |
| 240.815                       | 8.76E-02               |
| 242.042                       | 8.14E-02               |
| 247.068                       | 4.42E-04               |
| 250.404                       | 1.19E-01               |
| 252.115                       | 9.84E-02               |
| 262.896                       | 8.51E-02               |
| 270.407                       | 4.69E-01               |
| 276.011                       | 4.76E-02               |
| 279.333                       | 5.24E-01               |
| 280.114                       | 6.59E-02               |
| 285.982                       | 1.54E-01               |
| 290.698                       | 1.67E-01               |
| 296.040                       | 7.68E-02               |
| 300.214                       | 1.02E-01               |
| 307.184                       | 1.13E-01               |
| 316.204                       | 1.01E-01               |
| 323.971                       | 1.88E-01               |
| 331.546                       | 6.89E-03               |
| 345.948                       | 1.38E-01               |

|         |          |
|---------|----------|
| 359.684 | 1.14E-01 |
| 362.844 | 2.57E-01 |
| 366.042 | 1.64E-01 |
| 373.665 | 9.32E-01 |
| 383.660 | 2.27E-04 |
| 391.762 | 6.04E-02 |
| 406.745 | 2.01E-01 |
| 415.862 | 3.53E-01 |
| 443.632 | 1.63E-01 |
| 457.985 | 4.07E-01 |
| 459.230 | 4.57E-02 |
| 471.447 | 2.30E-05 |
| 474.056 | 2.56E-02 |
| 481.850 | 2.90E-01 |
| 486.372 | 1.33E-02 |
| 490.281 | 5.45E-03 |
| 491.752 | 3.84E-01 |
| 493.707 | 1.48E-01 |
| 494.942 | 3.14E-01 |
| 502.287 | 4.12E-01 |
| 505.662 | 1.02E+00 |
| 507.102 | 4.02E-01 |
| 507.817 | 2.80E-01 |
| 511.823 | 9.05E-01 |
| 514.432 | 3.66E-01 |
| 520.196 | 2.19E-04 |
| 522.687 | 9.63E-03 |
| 524.986 | 8.65E-02 |
| 530.251 | 5.84E-01 |
| 531.356 | 3.92E-02 |
| 532.769 | 2.78E-01 |
| 536.978 | 5.28E-01 |
| 541.389 | 8.74E-01 |
| 548.189 | 1.56E+00 |
| 553.268 | 2.27E-01 |
| 555.153 | 1.29E-01 |
| 561.166 | 7.71E-01 |
| 572.577 | 1.36E+00 |
| 573.293 | 4.73E+00 |
| 574.824 | 4.47E+00 |
| 583.839 | 1.11E-01 |
| 584.683 | 2.43E-02 |
| 587.577 | 2.62E+00 |
| 595.235 | 5.59E-01 |
| 607.760 | 5.87E-01 |
| 608.654 | 3.86E-02 |
| 621.145 | 5.23E-02 |
| 628.963 | 3.13E-02 |
| 640.744 | 1.93E+00 |
| 644.605 | 6.07E-01 |

|         |          |
|---------|----------|
| 644.779 | 6.39E-01 |
| 654.407 | 9.53E-01 |
| 654.913 | 3.70E-02 |
| 677.284 | 6.06E-01 |
| 682.364 | 4.87E-01 |
| 683.549 | 1.22E-03 |
| 690.031 | 4.95E-02 |
| 698.660 | 9.26E-01 |
| 731.595 | 2.22E-01 |

### Ti<sub>24</sub>C<sub>20</sub>

| Frequency (cm <sup>-1</sup> ) | Intensity (arb. units) |
|-------------------------------|------------------------|
| 120.300                       | 2.51E-03               |
| 130.758                       | 4.22E-06               |
| 150.710                       | 8.50E-03               |
| 160.087                       | 1.80E-05               |
| 163.692                       | 6.62E-03               |
| 166.561                       | 2.24E-02               |
| 169.946                       | 7.14E-07               |
| 171.926                       | 5.62E-06               |
| 177.658                       | 2.21E-05               |
| 181.542                       | 1.03E-05               |
| 185.602                       | 2.71E-06               |
| 189.486                       | 8.54E-05               |
| 192.727                       | 1.12E-05               |
| 197.118                       | 2.86E-04               |
| 198.028                       | 8.52E-04               |
| 201.348                       | 1.63E-03               |
| 203.668                       | 6.26E-01               |
| 207.338                       | 3.37E-05               |
| 212.055                       | 4.92E-02               |
| 213.875                       | 1.37E-01               |
| 216.374                       | 1.95E-06               |
| 223.010                       | 1.40E-04               |
| 224.470                       | 1.33E-02               |
| 229.130                       | 6.15E-05               |
| 231.036                       | 5.05E-02               |
| 238.187                       | 9.35E-02               |
| 238.239                       | 2.23E-02               |
| 239.396                       | 3.11E-05               |
| 244.935                       | 4.86E-02               |
| 245.180                       | 1.70E-03               |
| 247.415                       | 7.21E-02               |
| 248.442                       | 6.24E-04               |
| 249.061                       | 3.14E-02               |
| 257.546                       | 1.07E-02               |
| 257.930                       | 1.55E-04               |
| 260.735                       | 1.57E-02               |

|         |          |
|---------|----------|
| 268.263 | 2.10E-03 |
| 271.234 | 2.26E-02 |
| 278.670 | 1.65E-06 |
| 283.023 | 2.57E-05 |
| 291.601 | 1.73E-06 |
| 294.356 | 1.12E-05 |
| 298.730 | 2.79E-06 |
| 300.079 | 2.58E-05 |
| 302.288 | 1.40E-02 |
| 305.706 | 2.62E-06 |
| 306.071 | 6.43E-06 |
| 306.810 | 1.23E-06 |
| 308.801 | 3.27E-03 |
| 314.669 | 3.29E-04 |
| 328.599 | 8.59E-06 |
| 328.995 | 1.95E-06 |
| 342.003 | 2.40E-02 |
| 349.614 | 1.68E-02 |
| 349.847 | 4.51E-02 |
| 350.791 | 2.95E-01 |
| 356.421 | 1.87E-02 |
| 363.584 | 8.04E-06 |
| 368.833 | 1.24E-06 |
| 371.309 | 2.96E-06 |
| 375.031 | 3.17E-04 |
| 375.340 | 7.84E-03 |
| 381.141 | 2.11E-05 |
| 390.531 | 4.30E-02 |
| 397.186 | 1.56E-04 |
| 397.953 | 3.52E-02 |
| 406.504 | 1.30E-01 |
| 412.093 | 3.17E-06 |
| 438.719 | 2.90E-06 |
| 451.844 | 2.77E-05 |
| 460.429 | 6.35E-06 |
| 464.060 | 1.06E-04 |
| 465.557 | 4.98E-04 |
| 468.685 | 1.80E-01 |
| 470.209 | 5.80E-02 |
| 480.035 | 1.79E-05 |
| 497.408 | 1.50E-04 |
| 500.687 | 4.52E-01 |
| 501.035 | 1.14E-02 |
| 501.447 | 1.20E+00 |
| 505.712 | 1.52E-04 |
| 508.442 | 6.05E-04 |
| 510.099 | 4.03E-01 |
| 513.280 | 6.51E-02 |
| 518.450 | 4.62E-05 |
| 520.041 | 7.42E-05 |

|         |          |
|---------|----------|
| 526.945 | 9.56E-05 |
| 534.321 | 9.61E-01 |
| 534.529 | 1.01E-03 |
| 538.111 | 2.33E-01 |
| 547.172 | 5.46E+00 |
| 547.424 | 1.60E-03 |
| 553.935 | 2.38E-04 |
| 556.176 | 4.65E+00 |
| 559.729 | 7.92E-05 |
| 563.592 | 6.18E-04 |
| 565.667 | 2.49E+00 |
| 565.988 | 2.19E-02 |
| 575.882 | 6.04E-05 |
| 584.723 | 5.85E-01 |
| 600.083 | 4.00E-05 |
| 600.233 | 9.20E-05 |
| 608.137 | 3.05E-03 |
| 609.514 | 8.69E-05 |
| 624.686 | 1.54E-01 |
| 629.328 | 4.47E+00 |
| 631.273 | 1.24E-02 |
| 640.222 | 5.73E-03 |
| 641.144 | 7.25E-01 |
| 648.387 | 7.47E-04 |
| 648.922 | 1.55E-04 |
| 651.585 | 8.50E-01 |
| 657.070 | 2.92E-04 |
| 658.726 | 5.56E-04 |
| 664.590 | 1.46E-05 |
| 670.017 | 4.01E-05 |
| 672.957 | 1.19E-05 |
| 678.969 | 1.87E-01 |
| 682.262 | 2.47E-05 |
| 687.067 | 8.71E-02 |
| 687.139 | 1.70E-02 |
| 688.425 | 5.44E-03 |
| 696.463 | 4.40E+00 |
| 703.056 | 1.51E-05 |
| 760.895 | 2.40E+00 |
| 761.833 | 2.02E-04 |

### Ti<sub>23</sub>C<sub>24</sub>

| Frequency (cm <sup>-1</sup> ) | Intensity (arb. units) |
|-------------------------------|------------------------|
| 11.124                        | 1.91E-04               |
| 12.499                        | 1.52E-03               |
| 98.728                        | 2.99E-01               |
| 123.257                       | 1.97E-01               |
| 127.504                       | 1.33E-01               |

|         |          |
|---------|----------|
| 152.464 | 6.38E-02 |
| 154.900 | 4.31E-02 |
| 167.293 | 1.74E-02 |
| 172.823 | 1.07E-01 |
| 175.231 | 1.92E-04 |
| 180.495 | 8.76E-02 |
| 185.384 | 1.53E-02 |
| 188.858 | 2.16E-02 |
| 193.232 | 2.91E-02 |
| 199.809 | 3.90E-02 |
| 204.153 | 3.66E-01 |
| 207.679 | 7.78E-03 |
| 210.730 | 4.85E-02 |
| 217.578 | 9.88E-03 |
| 225.648 | 1.67E-02 |
| 229.037 | 1.63E-03 |
| 237.355 | 9.86E-03 |
| 239.204 | 8.47E-04 |
| 239.803 | 1.38E-02 |
| 251.846 | 4.04E-02 |
| 253.487 | 3.75E-02 |
| 254.483 | 7.68E-02 |
| 254.655 | 1.20E-02 |
| 258.295 | 2.73E-01 |
| 258.732 | 3.27E-03 |
| 261.446 | 6.38E-02 |
| 265.203 | 3.26E-02 |
| 271.984 | 3.23E-03 |
| 275.841 | 9.54E-03 |
| 278.031 | 9.72E-02 |
| 280.540 | 2.15E-01 |
| 282.636 | 2.15E-02 |
| 283.618 | 3.02E-02 |
| 288.369 | 1.06E-01 |
| 289.571 | 2.10E-02 |
| 297.949 | 9.64E-02 |
| 300.471 | 2.29E-02 |
| 302.237 | 4.58E-02 |
| 305.328 | 6.71E-02 |
| 307.078 | 3.01E-01 |
| 311.283 | 1.20E-01 |
| 314.834 | 5.61E-02 |
| 315.067 | 6.32E-02 |
| 325.707 | 8.61E-02 |
| 328.609 | 3.41E-01 |
| 333.268 | 1.33E-03 |
| 338.054 | 8.26E-02 |
| 338.384 | 2.22E-01 |
| 346.962 | 1.14E-01 |
| 352.232 | 4.05E-03 |

|         |          |
|---------|----------|
| 357.880 | 5.38E-01 |
| 365.826 | 1.57E-01 |
| 367.796 | 1.17E-01 |
| 370.945 | 1.20E-01 |
| 381.008 | 8.12E-03 |
| 382.526 | 2.23E-01 |
| 384.114 | 7.07E-02 |
| 387.810 | 2.63E-02 |
| 392.114 | 1.44E-04 |
| 392.874 | 4.37E-04 |
| 396.816 | 7.77E-03 |
| 402.790 | 6.00E-02 |
| 403.030 | 6.56E-02 |
| 406.595 | 1.04E-01 |
| 418.698 | 3.98E-03 |
| 420.592 | 5.11E-02 |
| 423.711 | 6.65E-03 |
| 426.135 | 4.34E-03 |
| 436.683 | 4.20E-02 |
| 438.705 | 5.06E-02 |
| 440.746 | 1.72E-02 |
| 445.556 | 4.61E-02 |
| 446.018 | 3.54E-01 |
| 453.989 | 1.69E-03 |
| 454.524 | 7.25E-03 |
| 465.051 | 4.94E-01 |
| 473.353 | 3.62E-01 |
| 476.299 | 1.23E+00 |
| 476.939 | 1.88E-01 |
| 480.067 | 1.42E-02 |
| 482.075 | 5.03E-01 |
| 483.599 | 7.70E-03 |
| 485.472 | 4.76E-01 |
| 493.523 | 3.39E-01 |
| 494.153 | 8.21E-01 |
| 496.147 | 8.55E-01 |
| 496.347 | 3.77E-01 |
| 498.184 | 5.92E-04 |
| 500.560 | 8.22E-01 |
| 511.328 | 2.84E-01 |
| 517.971 | 8.45E-02 |
| 527.646 | 3.59E+00 |
| 538.059 | 9.80E-03 |
| 547.149 | 2.10E+00 |
| 548.233 | 6.58E-01 |
| 567.828 | 3.74E+00 |
| 568.236 | 8.32E-01 |
| 570.176 | 1.42E+00 |
| 574.156 | 6.31E+00 |
| 581.407 | 3.01E+00 |

|         |          |
|---------|----------|
| 581.880 | 1.83E+00 |
| 586.037 | 3.78E+00 |
| 587.793 | 9.14E-02 |
| 599.258 | 2.63E-01 |
| 604.195 | 1.57E+00 |
| 611.928 | 3.61E-03 |
| 619.492 | 4.69E-03 |
| 620.587 | 4.85E-03 |
| 632.084 | 1.16E-02 |
| 642.025 | 1.11E-02 |
| 646.967 | 2.40E-02 |
| 660.744 | 7.09E-02 |
| 666.122 | 3.51E+00 |
| 668.128 | 1.55E-03 |
| 672.898 | 2.83E-02 |
| 680.136 | 7.54E-01 |
| 682.332 | 3.78E-01 |
| 692.438 | 1.19E+00 |
| 693.163 | 3.86E-01 |
| 693.513 | 9.06E-01 |
| 701.249 | 3.41E-01 |
| 704.799 | 3.19E-02 |
| 717.270 | 5.16E-01 |
| 721.119 | 8.54E-02 |
| 722.588 | 4.78E-02 |
| 729.130 | 1.53E+00 |
| 729.567 | 4.75E-01 |
| 735.304 | 2.34E+00 |
| 738.651 | 2.58E-02 |
| 781.702 | 7.17E-01 |

### Ti<sub>32</sub>C<sub>28</sub>

| Frequency (cm <sup>-1</sup> ) | Intensity (arb. units) |
|-------------------------------|------------------------|
| 118.549                       | 1.08E-05               |
| 118.724                       | 4.36E-06               |
| 150.544                       | 4.73E-05               |
| 150.702                       | 8.36E-05               |
| 150.918                       | 8.52E-05               |
| 155.832                       | 2.40E-04               |
| 156.696                       | 5.20E-04               |
| 157.218                       | 1.61E-03               |
| 167.719                       | 1.60E-01               |
| 168.198                       | 1.56E-01               |
| 168.491                       | 1.55E-01               |
| 179.945                       | 1.75E-05               |
| 180.723                       | 3.28E-04               |
| 186.358                       | 3.04E-04               |
| 186.936                       | 1.07E-03               |



|         |          |
|---------|----------|
| 187.586 | 2.86E-05 |
| 191.315 | 7.09E-02 |
| 191.353 | 7.47E-02 |
| 191.617 | 7.62E-02 |
| 208.105 | 4.86E-05 |
| 208.156 | 5.01E-04 |
| 208.224 | 5.07E-04 |
| 214.359 | 6.28E-04 |
| 215.516 | 9.54E-04 |
| 215.789 | 1.35E-03 |
| 222.610 | 1.72E-01 |
| 222.788 | 3.92E-02 |
| 222.820 | 1.03E-02 |
| 223.174 | 1.77E+00 |
| 223.608 | 1.91E+00 |
| 224.038 | 1.88E+00 |
| 230.316 | 3.00E-03 |
| 230.428 | 4.56E-03 |
| 230.511 | 8.65E-05 |
| 238.973 | 2.20E-03 |
| 244.018 | 1.51E-01 |
| 244.225 | 1.56E-01 |
| 244.327 | 1.58E-01 |
| 248.750 | 3.18E-02 |
| 248.943 | 2.99E-02 |
| 249.072 | 2.77E-02 |
| 251.975 | 1.82E-04 |
| 252.095 | 1.74E-04 |
| 252.146 | 9.23E-05 |
| 255.783 | 9.41E-05 |
| 261.321 | 6.01E-03 |
| 261.393 | 6.58E-03 |
| 261.554 | 5.40E-03 |
| 262.433 | 3.23E-04 |
| 262.513 | 3.52E-05 |
| 280.315 | 3.05E-01 |
| 280.422 | 3.17E-01 |
| 280.500 | 3.15E-01 |
| 288.062 | 1.02E-05 |
| 288.120 | 5.66E-05 |
| 288.410 | 4.28E-05 |
| 296.910 | 6.20E-05 |
| 300.776 | 6.09E-05 |
| 300.905 | 2.15E-04 |
| 304.471 | 2.15E-04 |
| 313.410 | 4.29E-04 |
| 313.535 | 1.18E-03 |
| 313.627 | 3.11E-04 |
| 314.537 | 3.39E-02 |
| 314.570 | 3.35E-02 |

|         |          |
|---------|----------|
| 314.799 | 3.32E-02 |
| 320.116 | 1.62E-04 |
| 320.368 | 2.20E-04 |
| 330.445 | 5.91E-04 |
| 330.503 | 7.11E-04 |
| 330.547 | 3.96E-04 |
| 336.561 | 2.92E-01 |
| 336.766 | 3.03E-01 |
| 337.070 | 3.07E-01 |
| 361.515 | 3.59E-02 |
| 361.702 | 3.27E-02 |
| 361.880 | 3.54E-02 |
| 366.633 | 1.04E-04 |
| 366.718 | 3.13E-04 |
| 366.802 | 2.56E-04 |
| 368.472 | 3.14E-04 |
| 369.067 | 4.53E-04 |
| 374.062 | 2.83E-01 |
| 374.196 | 2.81E-01 |
| 374.245 | 2.86E-01 |
| 380.403 | 6.93E-05 |
| 380.436 | 4.44E-04 |
| 380.886 | 1.66E-04 |
| 394.785 | 1.28E-01 |
| 395.173 | 1.21E-01 |
| 395.427 | 1.28E-01 |
| 411.365 | 2.02E-04 |
| 411.564 | 6.56E-04 |
| 411.772 | 5.29E-04 |
| 412.060 | 6.50E-05 |
| 436.490 | 1.67E-03 |
| 444.416 | 1.95E+00 |
| 444.605 | 1.98E+00 |
| 444.990 | 1.98E+00 |
| 462.381 | 2.22E-03 |
| 462.802 | 6.92E-03 |
| 462.961 | 3.32E-03 |
| 471.901 | 2.58E+00 |
| 472.026 | 2.49E+00 |
| 472.384 | 2.55E+00 |
| 482.269 | 4.68E-03 |
| 482.497 | 7.60E-03 |
| 495.280 | 6.47E-01 |
| 495.415 | 6.85E-01 |
| 495.583 | 6.41E-01 |
| 497.369 | 1.09E-02 |
| 503.727 | 6.70E-04 |
| 503.864 | 2.23E-04 |
| 504.102 | 3.60E-04 |
| 512.033 | 1.19E-01 |

|         |          |
|---------|----------|
| 512.461 | 1.24E-01 |
| 512.503 | 1.25E-01 |
| 515.204 | 2.57E-03 |
| 515.376 | 4.29E-05 |
| 523.402 | 2.81E-04 |
| 523.693 | 2.38E-05 |
| 523.917 | 3.77E-04 |
| 551.069 | 2.44E-02 |
| 553.703 | 2.09E+00 |
| 553.835 | 1.95E+00 |
| 553.960 | 1.80E+00 |
| 554.256 | 2.69E-01 |
| 554.554 | 1.32E-02 |
| 554.607 | 1.89E-01 |
| 555.700 | 2.95E-01 |
| 555.880 | 2.15E-02 |
| 556.922 | 2.67E+00 |
| 557.022 | 3.22E+00 |
| 557.486 | 3.39E+00 |
| 596.027 | 9.30E-06 |
| 596.608 | 3.91E-04 |
| 596.928 | 1.75E-04 |
| 597.134 | 3.72E-04 |
| 610.488 | 7.69E-02 |
| 610.726 | 1.66E-01 |
| 610.877 | 2.48E-01 |
| 611.147 | 3.52E-01 |
| 611.173 | 3.97E-01 |
| 611.449 | 3.97E-01 |
| 622.550 | 5.33E-05 |
| 622.714 | 2.70E-04 |
| 635.445 | 1.76E-01 |
| 635.557 | 1.71E-01 |
| 635.760 | 1.76E-01 |
| 639.582 | 9.55E-06 |
| 639.674 | 7.73E-04 |
| 639.704 | 3.46E-04 |
| 651.109 | 2.07E+00 |
| 651.169 | 2.12E+00 |
| 651.305 | 2.13E+00 |
| 663.283 | 7.69E-04 |
| 663.462 | 9.99E-05 |
| 665.374 | 2.77E-04 |
| 665.424 | 4.48E-04 |
| 667.091 | 4.51E-04 |
| 675.083 | 7.77E-04 |
| 675.210 | 4.01E-04 |
| 675.292 | 1.78E-03 |
| 675.659 | 2.56E-02 |
| 675.807 | 2.64E-02 |

|         |          |
|---------|----------|
| 675.899 | 2.21E-02 |
| 684.998 | 5.33E-01 |
| 685.172 | 5.35E-01 |
| 685.326 | 5.30E-01 |
| 698.665 | 2.01E-04 |
| 714.841 | 8.74E-03 |
| 715.888 | 2.28E+00 |
| 716.257 | 2.35E+00 |
| 716.413 | 2.34E+00 |

### Ti<sub>31</sub>C<sub>32</sub>

| Frequency (cm <sup>-1</sup> ) | Intensity (arb. units) |
|-------------------------------|------------------------|
| 66.510                        | 5.10E-01               |
| 67.496                        | 5.06E-01               |
| 114.593                       | 4.21E-01               |
| 135.919                       | 3.87E-02               |
| 136.441                       | 3.96E-02               |
| 155.507                       | 3.70E-05               |
| 159.214                       | 3.17E-02               |
| 159.748                       | 2.10E-03               |
| 160.399                       | 9.42E-03               |
| 163.153                       | 1.35E-01               |
| 163.649                       | 1.30E-01               |
| 172.671                       | 1.94E-01               |
| 177.716                       | 9.63E-02               |
| 178.027                       | 9.40E-02               |
| 180.613                       | 1.15E-04               |
| 185.409                       | 1.02E-02               |
| 185.635                       | 7.80E-03               |
| 190.094                       | 7.05E-02               |
| 200.881                       | 5.05E-02               |
| 200.947                       | 5.15E-02               |
| 206.150                       | 1.20E-06               |
| 209.444                       | 2.00E-02               |
| 209.584                       | 2.09E-02               |
| 221.851                       | 1.09E-02               |
| 227.702                       | 5.00E-03               |
| 227.710                       | 4.94E-03               |
| 230.133                       | 1.65E-05               |
| 237.965                       | 3.07E-02               |
| 238.150                       | 3.01E-02               |
| 239.750                       | 2.68E-03               |
| 241.711                       | 1.07E-02               |
| 241.873                       | 1.40E-02               |
| 242.383                       | 7.29E-06               |
| 244.768                       | 1.48E-01               |
| 244.806                       | 1.46E-01               |
| 246.422                       | 2.21E-04               |

|         |          |
|---------|----------|
| 248.320 | 1.28E-02 |
| 257.851 | 3.60E-02 |
| 257.996 | 3.59E-02 |
| 263.814 | 1.89E-03 |
| 263.853 | 1.72E-03 |
| 268.398 | 2.33E-02 |
| 268.456 | 2.34E-02 |
| 272.454 | 2.97E-05 |
| 272.514 | 6.97E-05 |
| 275.292 | 1.25E-02 |
| 275.486 | 2.07E-03 |
| 282.584 | 2.84E-02 |
| 282.858 | 2.28E-02 |
| 283.009 | 2.47E-02 |
| 287.120 | 4.35E-03 |
| 287.203 | 4.04E-03 |
| 290.627 | 4.34E-02 |
| 291.387 | 7.51E-02 |
| 291.436 | 7.57E-02 |
| 293.127 | 1.41E-05 |
| 307.651 | 1.11E-02 |
| 307.781 | 1.57E-02 |
| 307.918 | 8.31E-03 |
| 312.004 | 4.54E-02 |
| 312.130 | 4.52E-02 |
| 312.519 | 1.89E-04 |
| 316.713 | 4.32E-02 |
| 323.056 | 8.89E-02 |
| 323.137 | 9.11E-02 |
| 328.753 | 2.51E-02 |
| 328.896 | 2.66E-02 |
| 330.350 | 3.56E-01 |
| 335.296 | 2.05E-02 |
| 340.721 | 2.31E-05 |
| 344.101 | 4.13E-02 |
| 344.256 | 4.10E-02 |
| 354.783 | 4.91E-02 |
| 355.480 | 5.34E-02 |
| 359.008 | 3.30E-02 |
| 365.508 | 2.03E-02 |
| 365.664 | 1.86E-02 |
| 375.835 | 1.49E-02 |
| 376.070 | 4.44E-03 |
| 376.083 | 4.06E-03 |
| 378.405 | 5.84E-05 |
| 383.381 | 3.20E-03 |
| 383.408 | 2.68E-03 |
| 384.813 | 2.50E-05 |
| 385.760 | 5.84E-03 |
| 385.922 | 5.36E-03 |

|         |          |
|---------|----------|
| 401.792 | 6.55E-03 |
| 401.932 | 6.19E-03 |
| 402.572 | 8.39E-03 |
| 410.044 | 1.25E-01 |
| 410.680 | 8.39E-02 |
| 410.874 | 8.55E-02 |
| 415.845 | 3.84E-02 |
| 415.918 | 3.94E-02 |
| 417.323 | 7.59E-05 |
| 425.973 | 2.44E-05 |
| 426.054 | 8.14E-05 |
| 431.935 | 2.43E-05 |
| 435.170 | 2.79E-03 |
| 439.177 | 1.19E-01 |
| 440.270 | 4.99E-02 |
| 440.340 | 3.77E-02 |
| 440.789 | 1.91E-01 |
| 440.979 | 1.96E-01 |
| 458.177 | 4.47E-03 |
| 458.392 | 2.97E-01 |
| 458.505 | 3.00E-01 |
| 458.601 | 2.88E-01 |
| 462.658 | 1.43E-01 |
| 462.671 | 1.33E-01 |
| 467.309 | 2.93E-01 |
| 470.474 | 8.52E-04 |
| 470.549 | 2.92E-04 |
| 474.459 | 9.64E-02 |
| 474.583 | 8.95E-02 |
| 479.119 | 1.14E-04 |
| 481.939 | 3.39E-03 |
| 482.142 | 4.76E-03 |
| 488.162 | 3.98E-03 |
| 489.714 | 9.22E-04 |
| 491.959 | 9.95E-01 |
| 492.034 | 9.83E-01 |
| 492.728 | 2.60E-01 |
| 492.847 | 3.44E-01 |
| 497.772 | 1.73E+00 |
| 512.652 | 6.56E-02 |
| 512.748 | 6.96E-02 |
| 517.689 | 1.06E+00 |
| 536.349 | 6.08E-01 |
| 536.403 | 5.93E-01 |
| 544.902 | 1.83E-01 |
| 556.439 | 3.78E+00 |
| 559.696 | 8.34E+00 |
| 559.866 | 8.36E+00 |
| 568.318 | 1.30E-03 |
| 573.330 | 4.61E+00 |

|         |          |
|---------|----------|
| 573.744 | 4.76E+00 |
| 576.031 | 1.93E-01 |
| 576.276 | 2.86E-01 |
| 576.365 | 6.56E+00 |
| 590.353 | 6.76E-01 |
| 590.403 | 7.13E-01 |
| 590.960 | 3.50E-02 |
| 598.193 | 3.30E-04 |
| 604.109 | 4.79E-04 |
| 606.889 | 9.64E-01 |
| 610.829 | 2.39E-03 |
| 610.873 | 2.53E-03 |
| 613.831 | 7.73E-05 |
| 616.458 | 6.73E-02 |
| 616.490 | 6.04E-02 |
| 626.416 | 1.88E-03 |
| 626.476 | 1.09E-03 |
| 628.021 | 4.46E-03 |
| 628.139 | 5.35E-03 |
| 629.785 | 2.23E-02 |
| 648.946 | 1.10E-01 |
| 649.034 | 1.13E-01 |
| 652.074 | 2.26E-05 |
| 667.382 | 1.07E-01 |
| 667.565 | 1.06E-01 |
| 675.815 | 2.54E-02 |
| 677.816 | 1.87E+00 |
| 677.899 | 1.87E+00 |
| 682.589 | 2.80E+00 |
| 691.665 | 1.63E+00 |
| 691.669 | 1.63E+00 |
| 699.504 | 7.10E-01 |
| 699.682 | 7.40E-01 |
| 700.408 | 3.54E-01 |
| 707.136 | 1.36E+00 |
| 707.162 | 1.37E+00 |
| 708.771 | 3.28E-03 |
| 708.800 | 4.53E-03 |
| 709.804 | 4.16E-02 |
| 711.284 | 2.32E-04 |
| 711.932 | 5.82E-01 |
| 716.303 | 6.16E-01 |
| 716.416 | 6.48E-01 |
| 717.973 | 4.93E-01 |
| 750.049 | 6.67E-01 |
| 750.095 | 6.80E-01 |
| 755.688 | 2.97E-01 |
